# Supplementary material for: The phase transfer effect of sulfur in lithium–sulfur batteries
Source: Royal Society of Chemistry journal article supplement (doi:10.1039/c9ra07291h), 2019-01-01
Supplement: c9ra07291h1.pdf [file c9ra07291h1.pdf]

## Supporting information

### The phase transfer effect of sulfur in lithium–sulfur batteries

Ziyi Deng<sup>a,1</sup>, Lei Sun<sup>a,1</sup>, Yan Sun<sup>b</sup>, Chunhui Luo<sup>a</sup>, Qiang Zhao<sup>a,\*</sup>, Kangping Yan<sup>a</sup>

<sup>a</sup> College of Chemical Engineering, Sichuan University, Chengdu 610065, China

<sup>b</sup> School of Mechanical Engineering, Chengdu University, Chengdu 610106, China

\* Corresponding author. Email adress: scuzq@scu.edu.cn;

## Figures

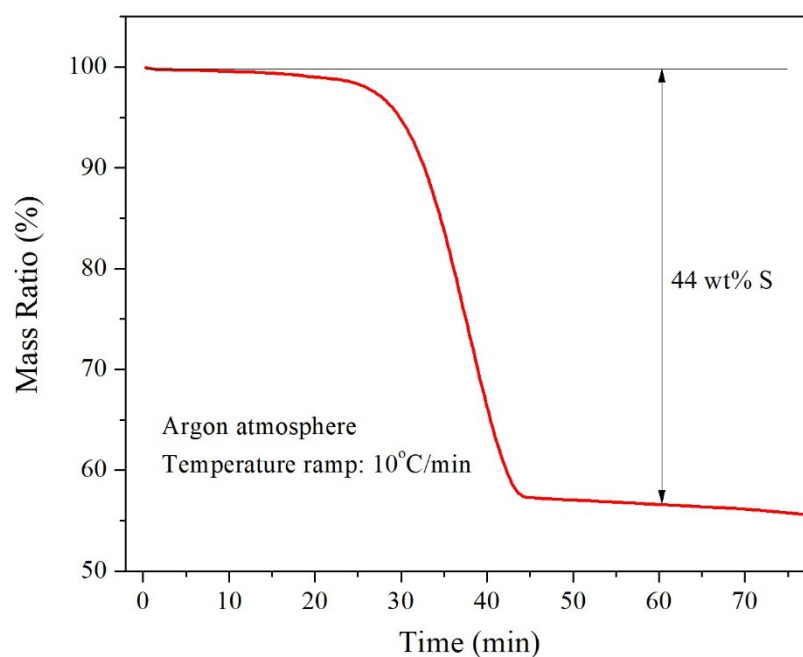

Fig. S1. TG analysis of the carbon/sulfur composite used as cathode material in this work.

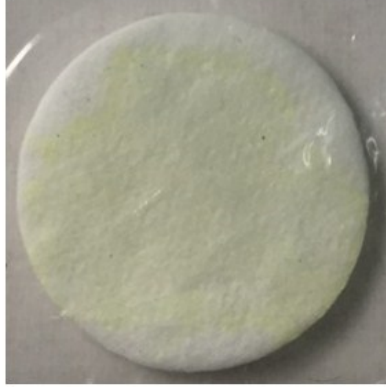

Fig. S2. Digital image of S-GFI film prepared by a dropping-coating method.

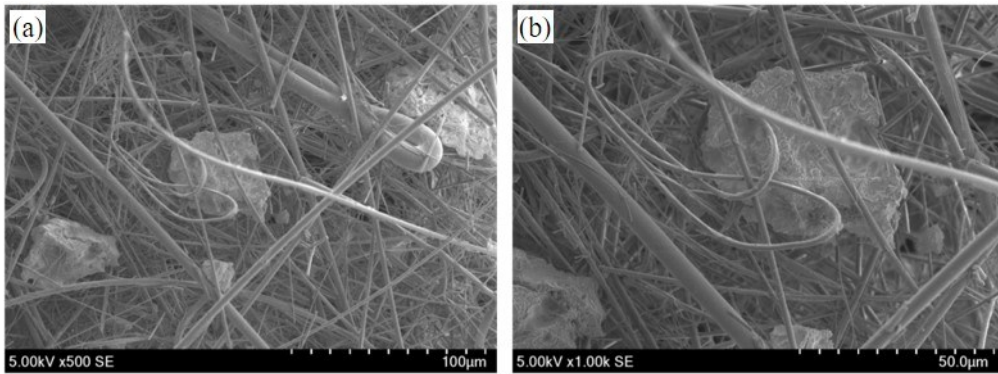

Fig. S3 SEM images of the S-GFI film by drop coating method.

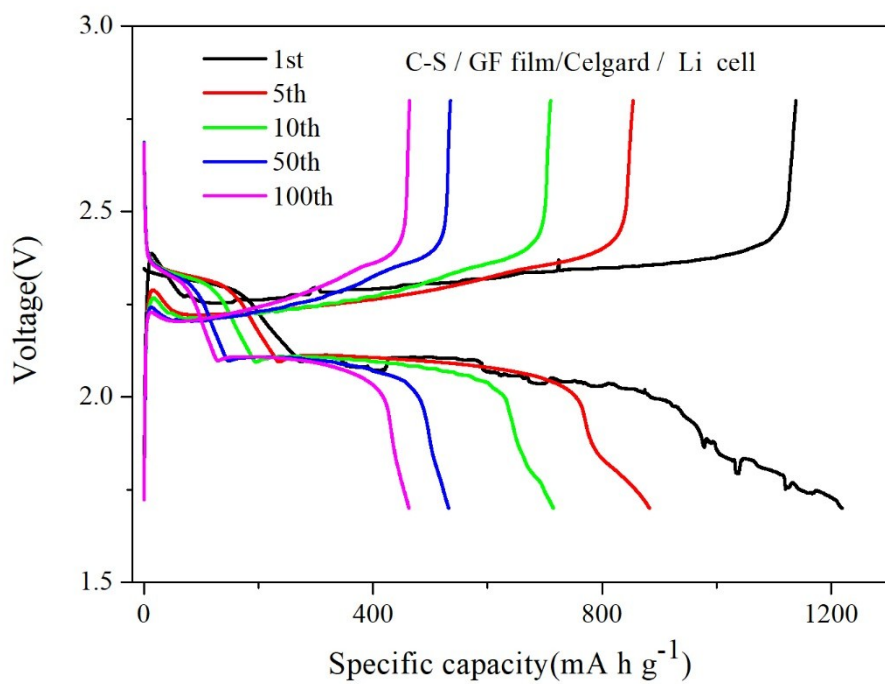

Fig. S4. Voltage profiles for discharging and charging of the C-S/Celgrad/Li cell

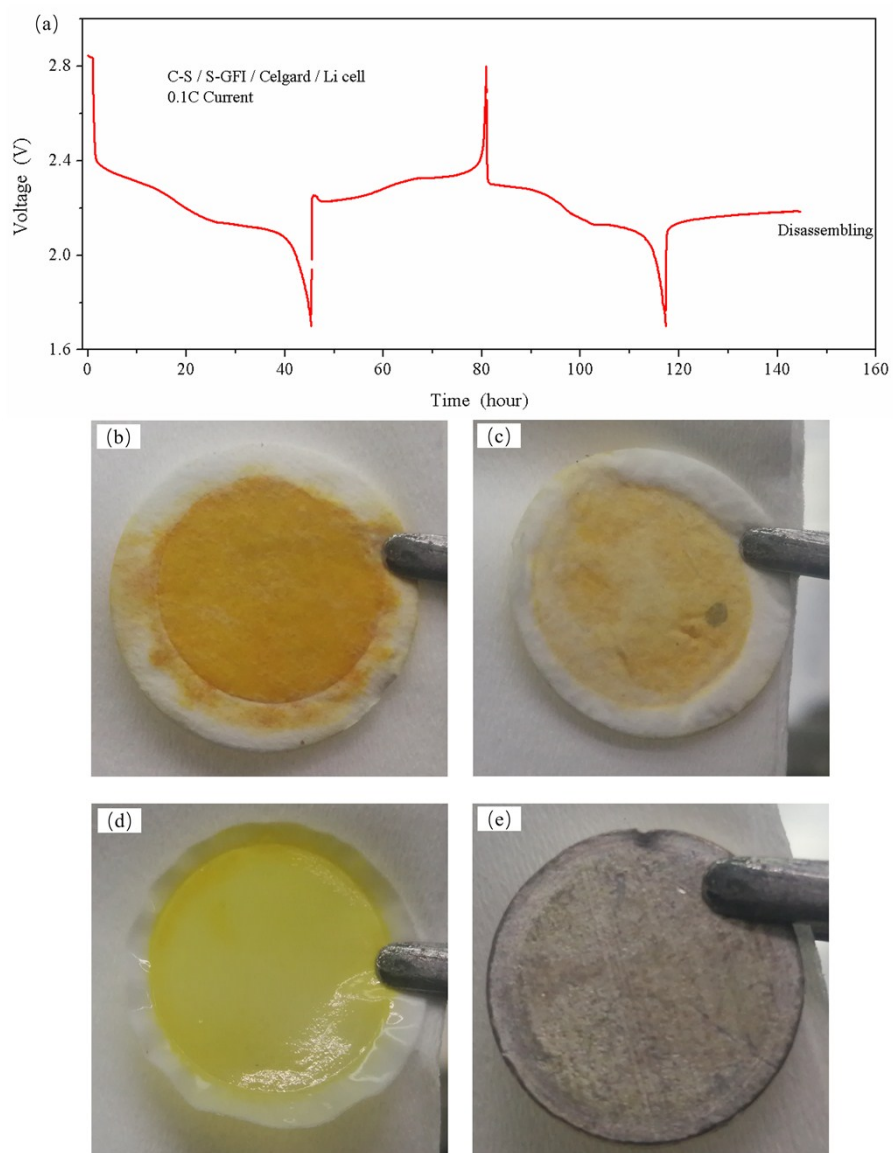

Fig. S5. The voltage profile for the first two discharge-charge cycles, the digital images of the surface of the S-GFI layer close to the cathode (b) and the separator (c), Celgard separator (d) and Li anode (e) collected from this battery.

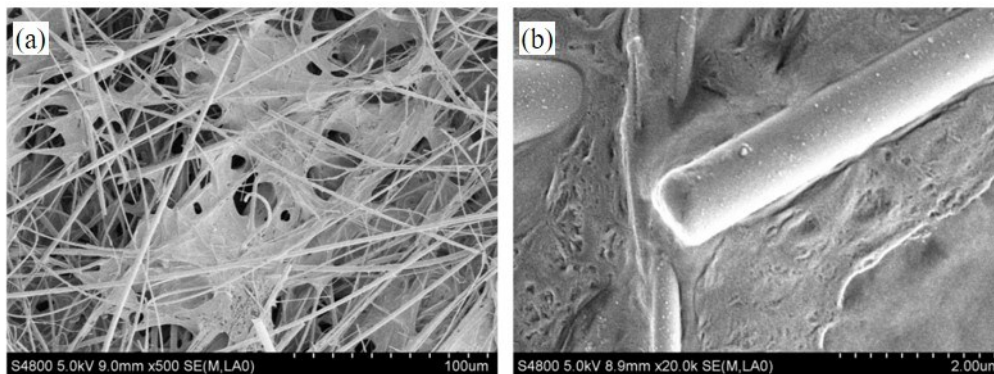

Fig. S6. SEM images of the S-GFI film after its initial discharge in Li-S battery.

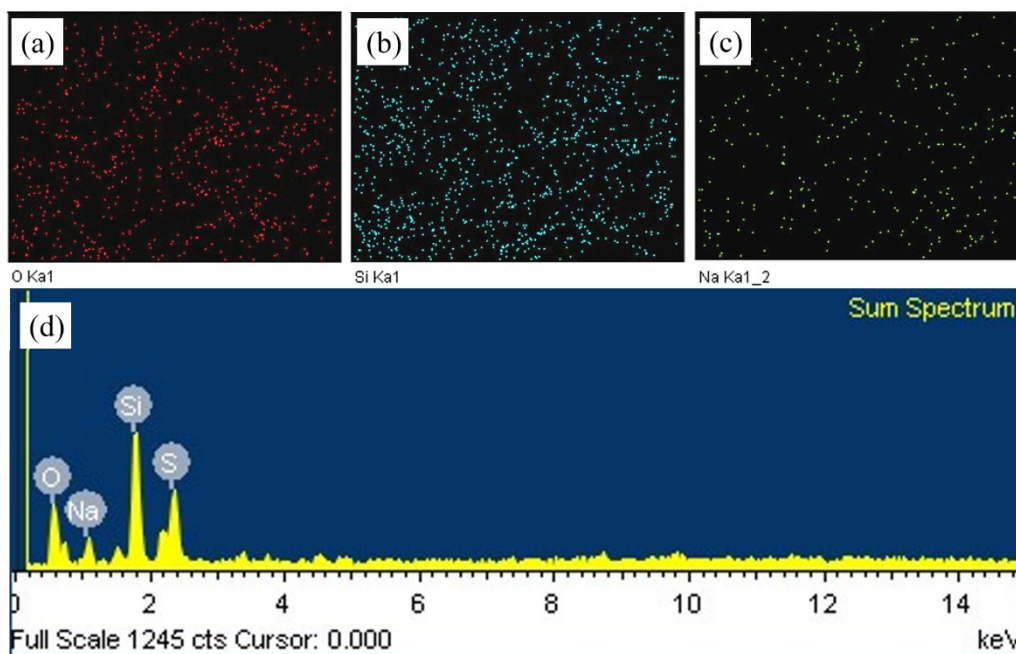

Fig. S7. The element analysis from EDS mapping of the S-GFI film after discharge
